# Supplementary material for: iTOP: inferring the topology of omics data
Source: Oxford University Press journal article supplement (doi:10.1093/bioinformatics/bty636), 2018-08-07
Supplement: bioinformatics_34_17_i988_s1.zip [file bioinformatics_34_17_i988_s1.zip]

# iTOP: Inferring the Topology of Omics Data

Nanne Aben<sup>1,2</sup>, Johan A. Westerhuis<sup>3</sup>, Yipeng Song<sup>3</sup>, Henk A.L. Kiers<sup>4</sup>,  
Magali Michaut<sup>1</sup>, Age K. Smilde<sup>3,\*</sup>, Lodewyk F.A. Wessels<sup>1,2,5,\*</sup>

**1** Division of Molecular Carcinogenesis, Oncode Institute, Netherlands Cancer Institute, Amsterdam 1066CX, The Netherlands.

**2** Faculty of EEMCS, Delft University of Technology, Delft 2628CD, The Netherlands.

**3** Swammerdam Institute for Life Sciences, University of Amsterdam, Amsterdam 1098XH, The Netherlands.

**4** Heymans Institute, University of Groningen, Groningen 9712CP, The Netherlands.

**5** Cancer Genomics Netherlands, Utrecht 3584CT, The Netherlands.

\*a.k.smilde@uva.nl and l.wessels@nki.nl

## 1 Supplementary Materials

### 1.1 The modified RV coefficient

For data matrices  $\mathbf{X}$  where the number of variables is much greater than the number of objects (i.e.  $p \gg n$ ), the RV coefficient is known to be biased upwards [5, 4]. To account for this bias, we remove the diagonal of the configuration matrix, as in the modified RV coefficient [5].

$$\begin{aligned}\tilde{\mathbf{S}}_i &= \mathbf{S}_i - \text{diag}(\mathbf{S}_i) \\ \tilde{\mathbf{S}}_j &= \mathbf{S}_j - \text{diag}(\mathbf{S}_j) \\ RV(\tilde{\mathbf{S}}_i, \tilde{\mathbf{S}}_j) &= \frac{\text{Vec}(\tilde{\mathbf{S}}_i)^T \text{Vec}(\tilde{\mathbf{S}}_j)}{\sqrt{\text{Vec}(\tilde{\mathbf{S}}_i)^T \text{Vec}(\tilde{\mathbf{S}}_i) \times \text{Vec}(\tilde{\mathbf{S}}_j)^T \text{Vec}(\tilde{\mathbf{S}}_j)}}\end{aligned}$$

We note that for the modified RV coefficient, the average of  $\text{Vec}(\tilde{\mathbf{S}})$  is not zero. This means that  $RV(\tilde{\mathbf{S}}_i, \tilde{\mathbf{S}}_j)$  is actually not equal to the correlation (but rather to the congruence) between  $\text{Vec}(\tilde{\mathbf{S}}_i)$  and  $\text{Vec}(\tilde{\mathbf{S}}_j)$ . Regardless, for simplicity, we do describe the RV coefficient in terms of the correlation between  $\text{Vec}(\tilde{\mathbf{S}}_i)$  and  $\text{Vec}(\tilde{\mathbf{S}}_j)$  in the introduction and the first results subsection.

Mayer et al. (2011) [4] have reported that the modified RV coefficient does not correct all of the abovementioned  $p \gg n$  bias. They propose the adjusted RV coefficient, based on the adjusted  $r^2$  measure. However, the adjusted RV coefficient requires the data to be column-wise centered and autoscaled (i.e. scaled such that each column has a standard deviation of one). As we have shown in the Methods and Materials of the main text, binary datasets can be centered by kernel centering the configuration matrix (essentially using a set

of linear transformation to center the kernel space (corresponding to  $\mathbf{S}$ ) rather than the input space ( $\mathbf{X}$ ). However, a similar approach cannot be taken with autoscaling, because determining the standard deviation (by which each column needs to be scaled) is a non-linear operation and hence cannot be performed in kernel space. Similarly, the adjusted RV coefficient requires one to take the adjusted  $r^2$  between columns in the input space, which is also a non-linear operation that hence cannot be performed in kernel space. Finally, the benefit of the adjusted RV coefficient over the modified RV coefficient is extremely small when using a sufficient number of objects (e.g.  $n > 50$ ) [4]. Therefore, we prefer to use the modified RV coefficient, which does not have the aforementioned limitations, while practically correcting the same amount of bias.

## 1.2 Partial Mantel Test

The concept of partial matrix correlations has been explored previously by Smouse et al. (1986) [6], who based their measure on the Mantel Test [3]. The Mantel test essentially measures the correlation on the vectorized form of the distance matrices (rather than configuration matrices) corresponding to  $\mathbf{X}_1$  and  $\mathbf{X}_2$ . We prefer to base the partial matrix correlation on the RV coefficient instead because of two disadvantages of the Mantel Test. First, the Mantel Test does not necessarily result in a correlation close to zero for orthogonal data, while the RV coefficient does. Second, the Mantel Test always results in high matrix correlations when applied to high-dimensional matrices. While the original RV coefficient also suffers from the second limitation, the modified RV coefficient [5] alleviates this problem. Notably, this modification does not alleviate the problem for the Mantel Test. While both issues do not affect significance estimates resulting from a permutation test, they greatly affect the interpretation of the coefficients. Hence, we prefer to base our work on the RV coefficient rather than the Mantel Test.

## 1.3 PC algorithm

We used the order-independent PC algorithm proposed by Colombo and Maathuis (2014) [2], that was implemented in the R package pcalg. This algorithm uses partial correlations to infer a topology between variables (or in our work: partial matrix correlations to infer a topology between datasets). After inferring the topology, the PC algorithm can also attempt to infer causality between nodes in the topology, using two additional assumptions: 1) the causality graph underlying the data is a DAG (Directed Acyclic Graph); and 2) all variables are observed (or in our work: there are no hidden / unobserved datasets). It is important to keep these assumptions in mind when interpreting causality inferred by the PC algorithm.

## 1.4 Elastic Net regression

We used Elastic Net regression [7] as implemented in the R package glmnet, with  $\lambda$  set to  $\lambda_{min}$  and  $\alpha$  set to 0.5. Predictive performance was assessed by using nested cross-validation, as implemented in the R package TANDEM, where the inner cross-validation loop was used to optimize the  $\lambda$  parameters for each stage, and the outer cross-validation loop was used to determine the predictive performance.

## 1.5 TANDEM

TANDEM [1] is a variable selection method that prioritizes variables selection from certain datasets over others. Consider a response vector  $\mathbf{y}$  (e.g. drug response of a single drug) and two datasets  $\mathbf{X}_1$  and  $\mathbf{X}_2$ . TANDEM performs the variable selection in two stages. In the first stage, Elastic Net regression [7] is used to explain as much of  $\mathbf{y}$  as possible using  $\mathbf{X}_1$ . In the second stage, Elastic Net regression is used to explain the residuals from the first stage (i.e. the part of  $\mathbf{y}$  that could not be explained using  $\mathbf{X}_1$ ) using  $\mathbf{X}_2$ .

We used the implementation from the R package TANDEM, with  $\lambda$  set to  $\lambda_{min}$  for both stages and  $\alpha$  set to 0.5. Predictive performance was assessed by using nested cross-validation, where the inner cross-validation loop was used to optimize the  $\lambda$  parameters for each stage, and the outer cross-validation loop was used to determine the predictive performance.

The relative contribution of a dataset was determined by dividing the sum-of-squares of the prediction from one dataset divided by the sum-of-squares of the overall prediction. For more information, we refer to Aben et al. (2016) [1].

We determined the variable importance  $VI$  of variable  $j$  in the same way as in our previous work on TANDEM [1], using:

$$VI = \frac{\|\mathbf{x}_j\boldsymbol{\beta}\|_2^2}{\|\mathbf{X}\boldsymbol{\beta}\|_2^2}$$

Where  $\mathbf{X}$  is the input matrix for TANDEM, defined as  $\mathbf{X} = [\mathbf{X}_1, \mathbf{X}_2]$ ;  $\mathbf{x}_j$  is the  $j$ 'th variable of  $\mathbf{X}$ ; and  $\boldsymbol{\beta}$  is the regression coefficients estimated by TANDEM.

## References

- [1] Nanne Aben, Daniel J Vis, Magali Michaut, and Lodewyk FA Wessels. Tandem: a two-stage approach to maximize interpretability of drug response models based on multiple molecular data types. *Bioinformatics*, 32(17):i413–i420, 2016.
- [2] Diego Colombo and Marloes H Maathuis. Order-independent constraint-based causal structure learning. *The Journal of Machine Learning Research*, 15(1):3741–3782, 2014.

- [3] Nathan Mantel. The detection of disease clustering and a generalized regression approach. *Cancer research*, 27(2 Part 1):209–220, 1967.
- [4] Claus-Dieter Mayer, Julie Lorent, and Graham W Horgan. Exploratory analysis of multiple omics datasets using the adjusted rv coefficient. *Statistical applications in genetics and molecular biology*, 10(1), 2011.
- [5] Age K Smilde, Henk AL Kiers, S Bijlsma, CM Rubingh, and MJ Van Erk. Matrix correlations for high-dimensional data: the modified rv-coefficient. *Bioinformatics*, 25(3):401–405, 2008.
- [6] Peter E Smouse, Jeffrey C Long, and Robert R Sokal. Multiple regression and correlation extensions of the mantel test of matrix correspondence. *Systematic zoology*, 35(4):627–632, 1986.
- [7] Hui Zou and Trevor Hastie. Regularization and variable selection via the elastic net. *Journal of the Royal Statistical Society: Series B (Statistical Methodology)*, 67(2):301–320, 2005.

## 2 Supplementary Figures

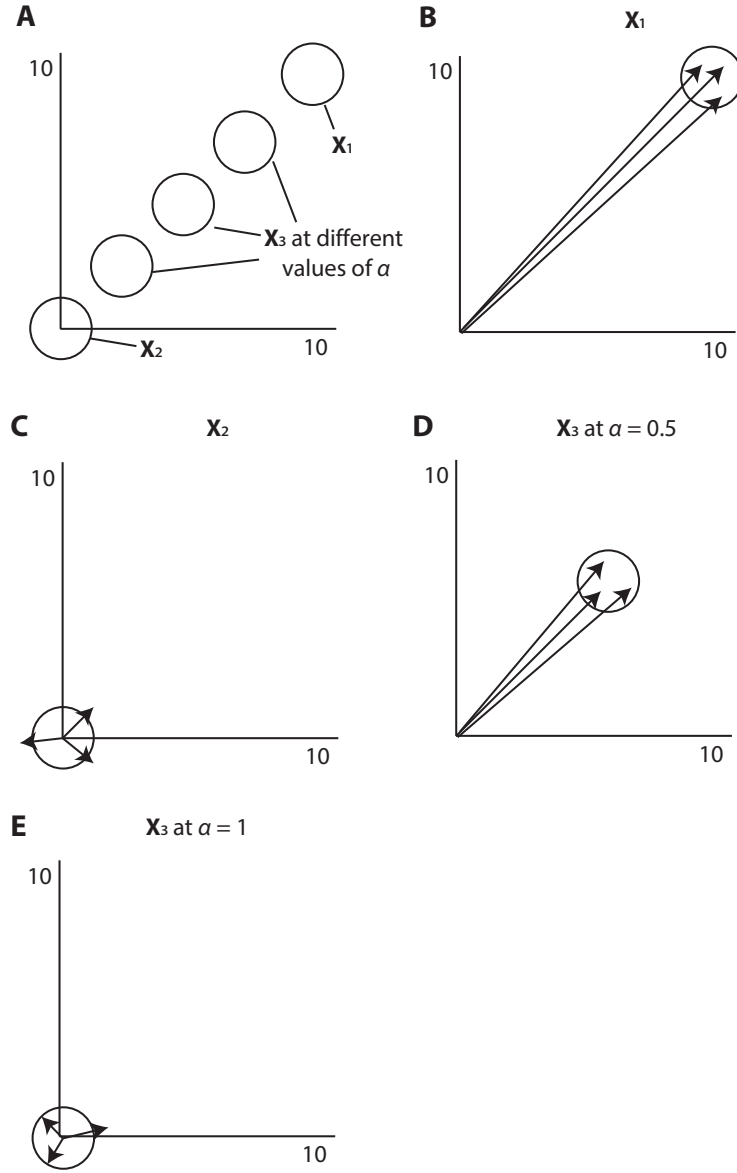

Figure 1: Illustration accompanying Figure 4A. (A) Cartoon of the densities of  $\mathbf{X}_1$ ,  $\mathbf{X}_2$  and  $\mathbf{X}_3$  in a two-dimensional space. (B-E) Cartoon of the directions of the inner products between objects from (B)  $\mathbf{X}_1$ , (C)  $\mathbf{X}_2$ , (D)  $\mathbf{X}_3$  at  $\alpha = 0.5$ , and (E)  $\mathbf{X}_3$  at  $\alpha = 1$ .

**A**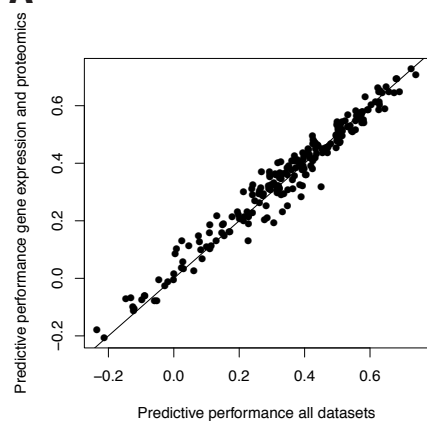**B**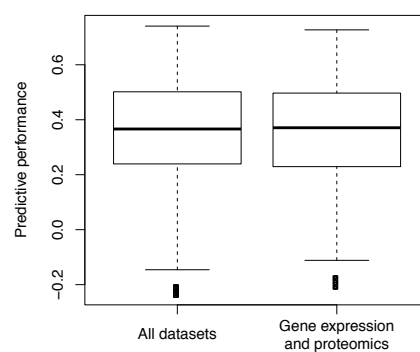**C**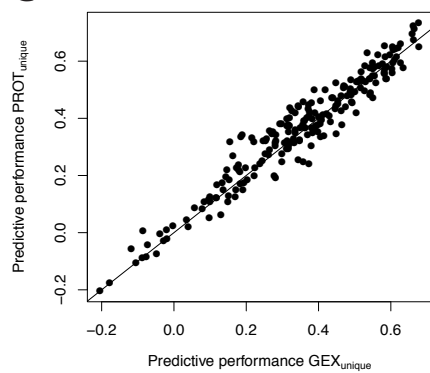**D**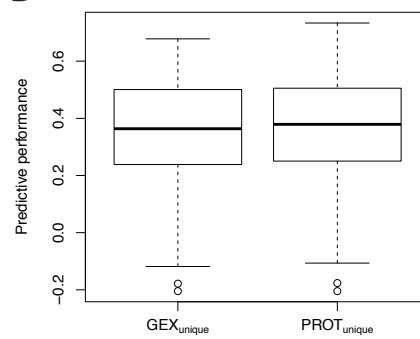

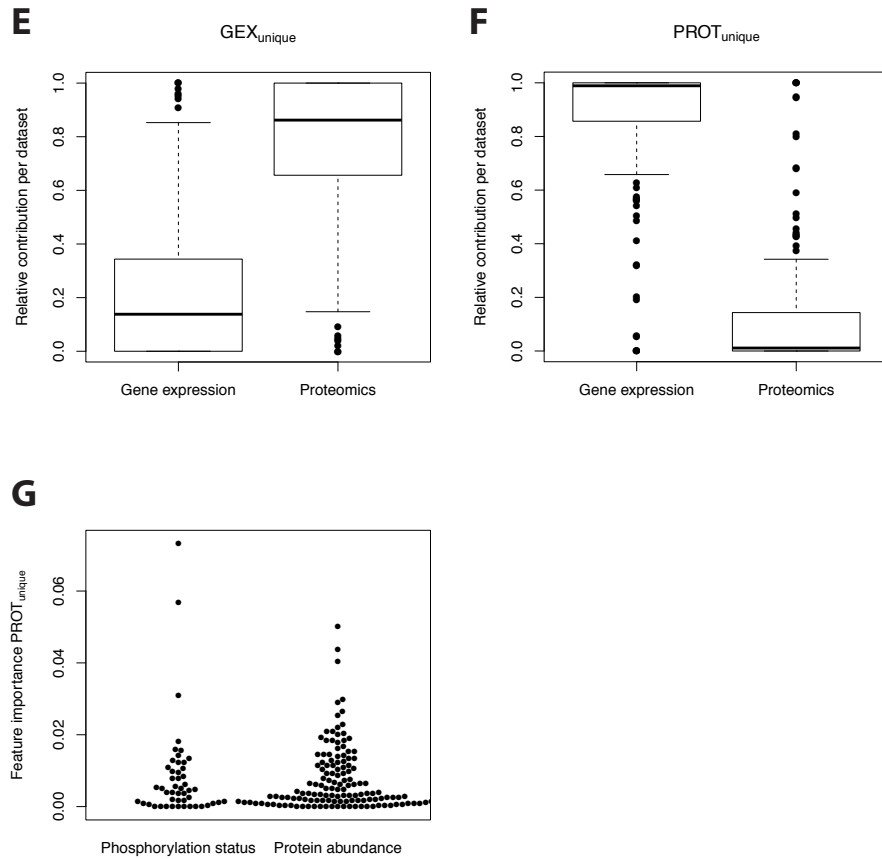

Figure 2: Drug response prediction models. (A) Predictive performance (Pearson correlation between observed and predicted drug response) of either a model trained on all datasets except drug response (i.e. mutation, CNA, methylation, cancer type, gene expression and proteomics), or a model trained on on gene expression and proteomics only, for each of the 217 drugs. (B) Predictive performance (Pearson correlation between observed and predicted drug response) of  $GEX_{unique}$  vs.  $PROT_{unique}$  models for each of the 217 drugs. (C&D) Distribution of relative contributions of gene expression and proteomics in  $GEX_{unique}$  and  $PROT_{unique}$  models respectively, across all 217 drugs. (E) variable importance for  $PROT_{unique}$  models (averaged across drugs) for two classes of variables in the proteomics data: phosphorylation status and protein abundance.
